# Supplementary material
Source: Research Square preprint supplement (doi:10.21203/rs.3.rs-9245067/v1)
Supplement: Supplementary file 1 [file 7390f2cec8d960215b5bd764.docx]

| First author, Year | Group | Total (ITT/mITT) | Responders |
| --- | --- | --- | --- |
| Zhang Y, 2021 | Low FODMAP diet (LFD) | 54 | 30 (55.6%) |
|  | Traditional dietary advice (TDA) | 54 | 26 (48.1%) |
| Algera JP, 2022 (FODMAP) | Low FODMAP diet (4 g/day) | 29 | 10 (34.5%) |
|  | Moderate FODMAP diet (23 g/day) | 29 | 6 (20.7%) |
| Singh P, 2025 | Mediterranean diet (MD) | 11 | 8(72.7%) |
|  | Low FODMAP diet (LFD) | 11 | 9 (81.8%) |
| Kasti AN, 2025 | Mediterranean low-FODMAP diet (MED-LFD) | 54 | 44 (81.5%) |
|  | NICE dietary guidelines (NICE) | 54 | 31 (57.4%) |
| Rej A, 2022 | Traditional dietary advice (TDA) | 33 | 14 (42.4%) |
|  | Low FODMAP diet (LFD) | 33 | 18 (54.5%) |
|  | Gluten-free diet (GFD) | 33 | 19 (57.6%) |
| Algera JP, 2022 (GFD) | Gluten-free diet | 20 | 6 (30%) |
|  | placebo | 20 | 5 (25%) |
| Nilholm C, 2022 | Starch- and sucrose-reduced diet (SSRD) | 78 | 57 (73.1%) |
|  | Habitual diet | 25 | 6 (24.0%) |
| Roth B, 2024 | Starch- and sucrose-reduced diet (SSRD) | 77 | 61 (79.2%) |
|  | Low FODMAP diet | 78 | 61 (78.2%) |
| Bamidele JO, 2025 | Mediterranean diet (MD) | 68 | 42 (61.8%) |
|  | Traditional dietary advice (TDA) | 71 | 30 (42.3%) |
| Nilholm C, 2019 | Starch- and sucrose-reduced diet (SSRD) | 80 | 57 (71.2%) |
|  | Habitual diet | 25 | 7 (28.0%) |

eTable 1. Raw dichotomous data for clinical response rate used in the meta-analysis.

| **Comparison (vs. Habitual/Control)** | **Pooled Effect (RR, 95% CI)** | **Quality of Evidence (GRADE)** | **Reasons for Downgrading** |
| --- | --- | --- | --- |
| **MED-LFD** | 2.37 (1.38–4.07) | Moderate | Risk of bias (unblinded trials); Imprecision due to wide confidence intervals |
| **SSRD** | 2.25 (1.52–3.34) | Moderate | Risk of bias (unblinded trials) |
| **MD (Pure)** | 2.25 (1.35–3.75) | Low | Risk of bias (unblinded trials); Imprecision due to wide confidence intervals |
| **LFD** | 2.17 (1.45–3.25) | Moderate | Risk of bias (unblinded trials) |
| **GFD** | 2.10 (1.26–3.50) | Low | Inconsistency; Imprecision due to wide confidence intervals |
| **TDA** | 1.67 (1.04–2.68) | Moderate | Risk of bias (unblinded trials) |

**eTable 2. GRADE Quality of Evidence Summary for Dietary Interventions in IBS**

**Abbreviations:** GRADE, Grading of Recommendations Assessment, Development and Evaluation; RR, risk ratio; CI, confidence interval; LFD, low FODMAP diet; TDA, traditional dietary advice; MD, Mediterranean diet; SSRD, starch- and sucrose-reduced diet; GFD, gluten-free diet; IBS, irritable bowel syndrome.
